# Supplementary material for: Depth to water table correction for initial carbon-14 activities in groundwater mean residence time estimation
Source: Copernicus journal article supplement (doi:10.5194/hess-25-5415-2021), 2021-10-11
Supplement: Supplementary file 1 [file hess-25-5415-2021-supplement.zip]

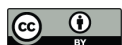

*Supplement of*

## **Depth to water table correction for initial carbon-14 activities in groundwater mean residence time estimation**

**Dylan J. Irvine et al.**

*Correspondence to:* Dylan J. Irvine ([dylan.irvine@cdu.edu.au](mailto:dylan.irvine@cdu.edu.au))

- [hess-25-5415-2021-supplement-title-page.pdf](#)
- [Irvine\\_14C\\_Supporting\\_Information\\_HESS\\_final\\_update.docx](#)

The copyright of individual parts of the supplement might differ from the article licence.
