# Supplementary material for: Depth to water table correction for initial carbon-14 activities in groundwater mean residence time estimation
Source: Copernicus journal article supplement (doi:10.5194/hess-25-5415-2021), 2021-10-11
Supplement: Supplementary file 1 [file Irvine_14C_Supporting_Information_HESS_final_update.docx]

Depth to water table correction for initial carbon-14 activities in groundwater mean residence time estimation

Dylan J. Irvine1,2, Cameron Wood3, Ian Cartwright4, Tanya Oliver2

1Research Institute for the Environment and Livelihoods, Charles Darwin University, Casuarina, 0810, Australia.

2National Centre for Groundwater Research and Training, and College of Science and Engineering, Flinders University, Bedford Park, 5042, Australia

3Department of Environment and Water, Adelaide, 5000, Australia

4School of Earth, Atmosphere and Environment, Monash University, Clayton, 3800, Australia

*Correspondence to*: Dylan J. Irvine (dylan.irvine@cdu.edu.au)

# Supporting information

This document contains three data tables (Tables S1, S2 and S3) and one figure (Fig. S1). Table S1 includes collated unsaturated zone carbon-14 data (14Cuz) from 13 studies. Table S2 includes collated groundwater 14C data (14Cgw) from the Limestone Coast region of South Australia and the Overs/ Goulburn-Broken catchments in Victoria, Australia. Table S3 includes calculated Mean Residence Times (MRTs) of groundwater using the Eqs. 1-4 of the main document. Fig. S1 shows time series of atmospheric activities of 14C and tritium (3H).

Table S1: Unsaturated zone Carbon-14 (14Cuz) activities.

| **Sample location ID** | **Depth (mbg)** | **14Cuz (pmC)** | **14Cuz error (±pmC)** | **δ13C (‰)** | **Sample Year** | **Reason if sample was excluded from data fitting process (Eqs. 2-4)** |
| --- | --- | --- | --- | --- | --- | --- |
| Bacon and Keller (1998) | | | | | | |
| - | 0.2 | 72.90 | - | -23.90 | 1994 | Organic matter present |
| - | 0.7 | 27.30 | - | -25.00 | 1994 | Organic matter present |
| - | 1.2 | 3.70 | - | -25.70 | 1994 | Organic matter present |
| - | 1.5 | 5.20 | - | -25.80 | 1994 | Organic matter present |
| - | 2.0 | 6.10 | - | -25.70 | 1994 | Organic matter present |
| - | 3.1 | 2.20 | - | -26.00 | 1994 | Organic matter present |
| - | 4.1 | 1.60 | - | -26.00 | 1994 | Organic matter present |
| - | 4.9 | 1.40 | - | -25.90 | 1994 | Organic matter present |
| - | 5.6 | 1.60 | - | -26.20 | 1994 | Organic matter present |
| - | 6.4 | 2.30 | - | -25.80 | 1994 | Organic matter present |
| - | 7.1 | 2.60 | - | -25.50 | 1994 | Organic matter present |
| Carmi et al. (2009) | | | | | | |
| 5166.3 | 2.5 | 32.60 | 0.50 | -10.00 | 2005 | Organic matter present |
| 5168.3 | 6.0 | 31.70 | 0.20 | -10.00 | 2005 | Organic matter present |
| 5159.3 | 4.5 | 16.90 | 0.20 | -7.70 | 2005 | Organic matter present |
| 4964.3 | 6.8 | 14.80 | 0.20 | -10.40 | 2005 | Organic matter present |
| 5169.3 | 7.5 | 8.80 | 0.10 | -11.70 | 2005 | Organic matter present |
| 4963 | 10.5 | 6.60 | 0.10 | -11.80 | 2005 | Organic matter present |
| 6028 | 12.0 | 1.50 | 0.10 | -11.50 | 2005 | Organic matter present |
| 5144.3 | 13.5 | 2.60 | 0.10 | -10.40 | 2005 | Organic matter present |
| Fritz et al. (1978) | | | | | | |
| Station 1 | 1.0 | 130.00 | 3.00 | -21.00 | 1975 | - |
| Station 1 | 1.0 | 137.00 | 9.00 | -21.00 | 1975 | - |
| Station 1 | 1.0 | 141.00 | 10.00 | -21.00 | 1975 | - |
| Station 7 | 1.0 | 136.00 | 7.00 | -23.40 | 1975 | - |
| Station 7 | 1.0 | 126.00 | 14.00 | -23.40 | 1975 | - |
| Piezometer 19-17 | 7.3 | 142.00 | 8.00 | -21.10 | 1975 | - |
| Gillon et al. (2009) | | | | | | |
| FS-1 | 3.0 | 109.00 | 1.00 | -25.50 | 2004 | - |
| FS-1 | 4.5 | 109.00 | 1.00 | -25.00 | 2004 | - |
| FS-1 | 3.0 | 110.00 | 1.00 | -25.50 | 2004 | - |
| FS-1 | 4.5 | 112.00 | 1.00 | -25.00 | 2004 | - |
| FS-2 | 1.2 | 111.00 | 1.00 | -24.60 | 2006 | - |
| AS | 0.8 | 90.00 | 1.00 | -15.70 | 2006 | - |
| AS | 4.8 | 95.00 | 1.00 | -13.80 | 2006 | - |
| AS | 7.8 | 85.00 | 1.00 | -13.20 | 2006 | - |
| AS | 10.8 | 83.00 | 1.00 | -12.90 | 2006 | - |
| AS | 15.8 | 80.00 | 1.00 | -13.80 | 2006 | - |
| AS | 2.3 | 84.00 | 1.00 | -13.90 | 2005 | - |
| AS | 7.8 | 84.00 | 1.00 | -13.80 | 2005 | - |
| AS | 10.8 | 84.00 | 1.00 | -13.80 | 2005 | - |
| AS | 12.8 | 84.00 | 1.00 | -13.40 | 2005 | - |
| AS | 19.8 | 82.00 | 1.00 | -13.80 | 2005 | - |
| AS | 22.8 | 83.00 | 1.00 | -14.20 | 2005 | - |
| AS | 0.8 | 106.00 | 1.00 | -14.20 | 2006 | - |
| AS | 2.3 | 99.00 | 1.00 | -15.20 | 2006 | - |
| AS | 4.8 | 95.00 | 1.00 | -14.40 | 2006 | - |
| AS | 7.8 | 78.00 | 1.00 | -13.60 | 2006 | - |
| AS | 10.8 | 77.00 | 1.00 | -13.50 | 2006 | - |
| AS | 15.8 | 76.00 | 1.00 | -15.20 | 2006 | - |
| AS | 22.8 | 76.00 | 1.00 | -13.00 | 2006 | - |
| Haas et al. (1983) | | | | | | |
| No. 4 | 9.1 | 1.75 | - | - | 1979 | Organic matter present |
| No. 4 | 9.1 | 1.43 | - | - | 1980 | Organic matter present |
| No. 4 | 9.1 | 2.35 | - | - | 1980 | Organic matter present |
| No. 4 | 9.1 | 2.72 | - | - | 1981 | Organic matter present |
| No. 4 | 9.1 | 2.22 | - | - | 1981 | Organic matter present |
| No. 4 | 9.1 | 1.81 | - | - | 1981 | Organic matter present |
| No. 4 | 12.8 | 2.09 | - | - | 1979 | Organic matter present |
| No. 4 | 12.8 | 2.08 | - | - | 1980 | Organic matter present |
| No. 4 | 12.8 | 2.32 | - | - | 1980 | Organic matter present |
| No. 4 | 12.8 | 2.82 | - | - | 1981 | Organic matter present |
| No. 4 | 12.8 | 2.40 | - | - | 1981 | Organic matter present |
| No. 1 | 3.0 | 3.21 | - | - | 1981 | Organic matter present |
| No. 1 | 3.0 | 2.99 | - | - | 1981 | Organic matter present |
| No. 1 | 3.0 | 5.46 | - | - | 1981 | Organic matter present |
| No. 1 | 5.2 | 6.03 | - | - | 1981 | Organic matter present |
| No. 1 | 10.9 | 1.85 | - | - | 1980 | Organic matter present |
| No. 1 | 10.9 | 1.81 | - | - | 1980 | Organic matter present |
| No. 1 | 10.9 | 2.06 | - | - | 1981 | Organic matter present |
| No. 1 | 10.9 | 1.57 | - | - | 1981 | Organic matter present |
| No. 1 | 10.9 | 1.45 | - | - | 1981 | Organic matter present |
| No. 6 | 3.0 | 114.16 | - | - | 1979 | - |
| No. 6 | 3.0 | 113.26 | - | - | 1980 | - |
| No. 6 | 3.0 | 112.79 | - | - | 1980 | - |
| No. 6 | 3.0 | 112.18 | - | - | 1981 | - |
| No. 6 | 3.0 | 112.52 | - | - | 1981 | - |
| No. 6 | 3.0 | 112.33 | - | - | 1981 | - |
| No. 6 | 5.8 | 90.90 | - | - | 1979 | - |
| No. 6 | 5.8 | 86.24 | - | - | 1980 | - |
| No. 6 | 5.8 | 86.29 | - | - | 1980 | - |
| No. 6 | 5.8 | 86.02 | - | - | 1981 | - |
| No. 6 | 5.8 | 85.47 | - | - | 1981 | - |
| No. 6 | 5.8 | 86.84 | - | - | 1981 | - |
| No. 6 | 8.5 | 51.16 | - | - | 1979 | - |
| No. 6 | 8.5 | 53.07 | - | - | 1980 | - |
| No. 6 | 8.5 | 51.28 | - | - | 1980 | - |
| No. 6 | 8.5 | 52.45 | - | - | 1981 | - |
| No. 6 | 8.5 | 52.30 | - | - | 1981 | - |
| No. 6 | 8.5 | 52.96 | - | - | 1981 | - |
| No. 4 | 2.7 | 103.00 | - | - | 1979 | - |
| No. 4 | 2.7 | 95.13 | - | - | 1980 | - |
| No. 4 | 2.7 | 83.72 | - | - | 1980 | - |
| No. 4 | 2.7 | 81.52 | - | - | 1981 | - |
| No. 4 | 2.7 | 87.38 | - | - | 1981 | - |
| No. 4 | 2.7 | 91.70 | - | - | 1981 | - |
| No. 4 | 5.8 | 10.00 | - | - | 1979 | Organic matter present |
| No. 4 | 5.8 | 10.92 | - | - | 1980 | Organic matter present |
| No. 4 | 5.8 | 8.79 | - | - | 1980 | Organic matter present |
| No. 4 | 5.8 | 8.82 | - | - | 1981 | Organic matter present |
| No. 4 | 5.8 | 9.29 | - | - | 1981 | Organic matter present |
| No. 4 | 5.8 | 10.71 | - | - | 1981 | Organic matter present |
| No. 1 | 13.7 | 20.35 | - | - | 1980 | Organic matter present |
| No. 1 | 13.7 | 9.04 | - | - | 1980 | Organic matter present |
| No. 1 | 13.7 | 3.65 | - | - | 1981 | Organic matter present |
| No. 1 | 13.7 | 3.12 | - | - | 1981 | Organic matter present |
| Kunkler (1969) | | | | | | |
| TA-52-22 | 85.9 | 101.0 | - | -18.5 | 1967 | Samples influenced by modern gas |
| TA-52-23 | 24.6 | 115.0 | - | -17.9 | 1967 | Samples influenced by modern gas |
| Leaney and Allison (1986) | | | | | | |
| - | 5.0 | 84.86 | - | - | 1984 | Deep rooted vegetation |
| - | 16.2 | 95.59 | - | - | 1984 | Deep rooted vegetation |
| - | 24.1 | 95.63 | - | - | 1984 | Deep rooted vegetation |
| - | 34.5 | 93.86 | - | - | 1984 | Deep rooted vegetation |
| - | 15.1 | 94.41 | - | - | 1984 | Deep rooted vegetation |
| - | 25.3 | 93.26 | - | - | 1984 | Deep rooted vegetation |
| - | 34.2 | 90.15 | - | - | 1984 | Deep rooted vegetation |
| - | 38.3 | 90.28 | - | - | 1984 | Deep rooted vegetation |
| Reardon et al. (1979) | | | | | | |
| - | 5.0 | 110.00 | - | - | 1980 | - |
| Thornstenson et al. (1983) | | | | | | |
| Lamb Site #5 | 5.8 | 113.1 | - | -20.6 | 1979 | - |
| Lamb Site #4 | 11.0 | 111.5 | - | -22.9 | 1979 | - |
| Lamb Site #3 | 17.1 | 108.4 | - | -18.7 | 1979 | - |
| Lamb Site #2 | 21.4 | 108.6 | - | -21.2 | 1979 | - |
| Glenn Site #6 | 7.0 | 91.2 | - | -16.03 | 1979 | - |
| Glenn Site #5 | 13.4 | 62.9 | - | -25.3 | 1979 | - |
| Glenn Site #4 | 19.8 | 60.2 | - | -17.3 | 1979 | - |
| Glenn Site #3 | 25.3 | 63.7 | - | -23.1 | 1979 | - |
| Glenn Site #2 | 36.3 | 62.5 | - | -27.7 | 1979 | - |
| Glenn Site #1 | 44.5 | 56.2 | - | -25.9 | 1979 | - |
| Thornstenson et al. (1998) | | | | | | |
| - | 0.3 | 113.10 | - | -17.45 | 1992 | - |
| - | 1.0 | 114.30 | - | -12.85 | 1992 | - |
| - | 2.1 | 108.60 | - | -18.54 | 1992 | - |
| - | 2.7 | 110.30 | - | -17.52 | 1992 | - |
| - | 8.2 | 98.70 | - | -15.75 | 1992 | - |
| - | 10.1 | 95.20 | - | -15.66 | 1992 | - |
| Walvoord et al. (2005) | | | | | | |
| - | 0.2 | 113.49 | - | - | 1992 | - |
| - | 0.8 | 115.19 | - | - | 1992 | - |
| - | 1.8 | 109.22 | - | - | 1992 | - |
| - | 2.3 | 110.92 | - | - | 1992 | - |
| - | 7.6 | 99.27 | - | - | 1992 | - |
| - | 9.9 | 98.41 | - | - | 1992 | - |
| - | 9.6 | 95.57 | - | - | 1992 | - |
| - | 11.7 | 88.47 | - | - | 1992 | - |
| - | 17.8 | 76.81 | - | - | 1992 | - |
| - | 27.5 | 54.35 | - | - | 1992 | - |
| - | 56.4 | 28.15 | - | - | 1992 | - |
| - | 92.4 | 16.70 | - | - | 1992 | - |
| - | 104.2 | 17.52 | - | - | 1992 | - |
| - | 104.4 | 21.49 | - | - | 1992 | - |
| - | 106.9 | 20.07 | - | - | 1992 | - |
| Wood et al. (2014) | | | | | | |
| 18611-5 | 5.0 | 105.26 | 0.44 | -15.70 | 2011 | - |
| 18611-8 | 8.0 | 106.84 | 0.48 | -17.10 | 2011 | - |
| 18611-11 | 11.0 | 104.26 | 0.42 | -16.80 | 2011 | - |
| 18611-16 | 16.0 | 94.61 | 0.39 | -15.90 | 2011 | - |
| 18611-21 | 21.0 | 80.30 | 0.39 | -16.00 | 2011 | - |
| 18611-26 | 26.0 | 72.63 | 0.33 | -15.90 | 2011 | - |
| 18779-5 | 5.0 | 107.39 | 0.55 | -14.30 | 2011 | - |
| 18779-8 | 8.0 | 107.95 | 0.48 | -15.60 | 2011 | - |
| 18779-11 | 11.0 | 107.03 | 0.42 | -15.20 | 2011 | - |
| 18779-16 | 16.0 | 92.91 | 0.38 | -15.80 | 2011 | - |
| 18779-21 | 21.0 | 79.14 | 0.36 | -16.00 | 2011 | - |
| 18781-5 | 5.0 | 107.34 | 0.53 | -15.10 | 2011 | - |
| 18781-8 | 8.0 | 104.73 |  | -14.80 | 2011 | - |
| 18781-11 | 11.0 | 89.49 | 0.38 | -13.90 | 2011 | - |
| 18781-16 | 16.0 | 54.55 | 0.28 | -14.20 | 2011 | - |
| 18893-3 | 3.0 | 108.00 | 0.44 | -15.40 | 2012 | - |
| 18893-5 | 5.0 | 104.99 | 0.37 | -15.10 | 2012 | - |
| 18893-10 | 10.0 | 104.31 | 0.33 | -16.80 | 2012 | - |
| 18893-12 | 12.0 | 101.32 | 0.31 | -16.60 | 2012 | - |
| 18893-15 | 15.0 | 95.38 | 0.36 | -16.60 | 2012 | - |
| 18893-18 | 18.0 | 86.20 | 0.32 | -15.10 | 2012 | - |
| 18897-5 | 5.0 | 102.61 | 0.44 | -13.50 | 2012 | - |
| 18897-6 | 6.0 | 108.69 | 0.35 | -15.10 | 2012 | - |
| 18897-7 | 7.0 | 107.05 | 0.40 | -14.70 | 2012 | - |
| 18897-8 | 8.0 | 106.42 | 0.36 | -14.30 | 2012 | - |
| Yang et al. (1985) | | | | | | |
| 1 | 12.8 | 120.55 | 0.66 | -25.68 | 1984 | Samples influenced by modern gas |
| 2 | 20.3 | 67.42 | 0.87 | -14.58 | 1984 | Samples influenced by modern gas |
| 3 | 28.3 | 62.57 | 1.95 | -11.70 | 1984 | Samples influenced by modern gas |
| 3 | 28.3 | 79.96 | 1.45 | -17.68 | 1985 | Samples influenced by modern gas |
| 4 | 39.9 | 77.37 | 1.52 | -19.96 | 1984 | Samples influenced by modern gas |
| 4 | 39.9 | 87.57 | 1.08 | -20.79 | 1985 | Samples influenced by modern gas |
| 5 | 61.3 | 77.35 | 0.79 | -15.68 | 1984 | Samples influenced by modern gas |
| 5 | 61.3 | 72.15 | 0.88 | -17.87 | 1985 | Samples influenced by modern gas |
| 6 | 81.1 | 77.24 | 1.48 | -15.27 | 1984 | Samples influenced by modern gas |
| 7 | 106.1 | 76.98 | 0.90 | -14.79 | 1984 | Samples influenced by modern gas |
| 7 | 106.1 | 72.88 | 0.74 | -16.59 | 1985 | Samples influenced by modern gas |
| 8 | 128.3 | 74.62 | 0.67 | -15.18 | 1984 | Samples influenced by modern gas |

Table S2: Groundwater chemistry data from the Limestone Coast and the Ovens/ Goulburn-Broken catchments. Sample ID is used as the *y*-axis on Fig. 4 in the main document. Well ID numbers from original publications.

| Sample ID | Well ID | Sample year | Longitude | Latitude | Depth to water (mbg) | Sample depth (mbg) | 14Cgw (pmC) | 3H (TU) |
| --- | --- | --- | --- | --- | --- | --- | --- | --- |
| Limestone Coast | | | | | | | | |
| 0 | 6923-3682 | 1989 | 140.487 | -37.068 | 1.6 | 25.0 | 54.4 | - |
| 1 | 7021-1043 | 2009 | 140.791 | -38.026 | 0.5 | - | 66.1 | - |
| 2 | 7022-128 | 2012 | 140.931 | -37.848 | 27.8 | 24.4 | 62.4 | - |
| 3 | 7022-139 | 2012 | 140.922 | -37.896 | 26.4 | 25.8 | 48.8 | - |
| 4 | 7022-837 | 1988-1990 | 140.882 | -37.771 | 5.4 | 8.9 | 27.0 | - |
| 5 | 7022-1042 | 1988-1990 | 140.941 | -37.552 | 2.0 | 6.2 | 78.2 | - |
| 6 | 7022-1094 | 1988-1990 | 140.839 | -37.585 | 7.2 | 9.5 | 77.1 | - |
| 7 | 7022-1863 | 1988-1990 | 140.816 | -37.546 | 12.2 | 22.0 | 62.5 | - |
| 8 | 7022-8517 | 2000 | 140.858 | -37.604 | 6.1 | 22.6 | 14.1 | - |
| 9 | 7022-8518 | 2000 | 140.858 | -37.604 | 5.3 | 15.8 | 19.3 | - |
| 10 | 7022-8519 | 36678 | 140.858 | -37.604 | 6.0 | 10.0 | 59.2 | - |
| 11 | 7022-8520 | 2000 | 140.858 | -37.604 | 6.0 | 5.3 | 83.0 | - |
| 12 | 7022-8522 | 2000 | 140.944 | -37.551 | 8.5 | 37.0 | 48.8 | - |
| 13 | 7022-8523 | 2000 | 140.944 | -37.551 | 10.1 | 29.0 | 56.8 | - |
| 14 | 7022-8524 | 2000 | 140.944 | -37.551 | 10.0 | 18.5 | 64.7 | - |
| 15 | 7022-8525 | 2000 | 140.944 | -37.551 | 8.0 | 7.5 | 72.8 | - |
| 16 | 7022-10572 | 2012 | 140.931 | -37.842 | 27.5 | 83.5 | 13.4 | - |
| 17 | 7022-10573 | 2012 | 140.931 | -37.833 | 18.5 | 76.0 | 69.6 | - |
| 18 | 7022-10574 | 2012 | 140.934 | -37.822 | 10.3 | 56.3 | 77.3 | - |
| 19 | 7022-10687 | 2012 | 140.929 | -37.859 | 26.9 | 140.0 | 6.7 | - |
| 20 | 7022-10688 | 2012 | 140.928 | -37.861 | 25.8 | 37.0 | 5.2 | - |
| 21 | 7022-10776 | 1905 | 140.883 | -37.545 | 5.6 | 44.0 | 84.7 | - |
| 22 | 7022-10778 | 1905 | 140.858 | -37.603 | 25.7 | 63.5 | 57.2 | - |
| 23 | 7022-10781 | 2011 | 140.942 | -37.549 | 22.7 | 60.5 | 44.5 | - |
| 24 | 7023-5280 | 2012 | 140.841 | -37.367 | 6.5 | 62.5 | 9.7 | - |
| 25 | 7023-7133 | 2012 | 140.942 | -37.269 | 7.2 | 15.0 | 64.5 | - |
| 26 | 7023-7134 | 2012 | 140.962 | -37.257 | 17.5 | 45.5 | 68.5 | - |
| 27 | 7023-7135 | 2012 | 140.929 | -37.284 | 6.6 | 40.0 | 44.3 | - |
| 28 | 7024-2960 | 1989 | 140.923 | -36.871 | 10.6 | 15.0 | 63.6 | - |
| 29 | 7024-5457 | 2003 | 140.585 | -36.642 | 5.3 | 10.5 | 82.9 | - |
| 30 | 7024-5458 | 2003 | 140.592 | -36.655 | 5.8 | 12.3 | 71.0 | - |
| 31 | 7024-5459 | 2005 | 140.565 | -36.668 | 12.4 | 41.0 | 36.5 | - |
| 32 | 7024-5460 | 2005 | 140.579 | -36.661 | 15.3 | 44.5 | 11.8 | - |
| 33 | 7024-5462 | 2005 | 140.542 | -36.650 | 22.5 | 19.7 | 54.1 | - |
| 34 | 7024-5463 | 2005 | 140.578 | -36.661 | 14.7 | 47.0 | 5.2 | - |
| 35 | 7024-5464 | 2005 | 140.579 | -36.661 | 15.6 | 18.0 | 70.1 | - |
| 36 | 7024-5465 | 2005 | 140.579 | -36.661 | 15.6 | 21.5 | 61.4 | - |
| 37 | 7024-5466 | 2005 | 140.579 | -36.661 | 16.2 | 32.3 | 43.3 | - |
| 38 | 7024-5468 | 2005 | 140.559 | -36.671 | 11.4 | 15.3 | 55.5 | - |
| 39 | 7024-5470 | 2005 | 140.561 | -36.640 | 7.5 | 26.0 | 73.8 | - |
| 40 | 7024-5471 | 2005 | 140.576 | -36.642 | 7.5 | 12.1 | 73.5 | - |
| 41 | 7025-865 | 2015 | 140.663 | -36.303 | 16.5 | 32.7 | 67.6 | - |
| 42 | 7025-868 | 2015 | 140.655 | -36.300 | 10.7 | 32.0 | 60.8 | - |
| 43 | 7025-2615 | 2015 | 140.661 | -36.299 | 9.4 | 21.2 | 62.0 | - |
| 44 | 7025-3222 | 2015 | 140.658 | -36.299 | 11.5 | 32.5 | 61.0 | - |
| 45 | 7025-3875 | 2015 | 140.668 | -36.298 | 16.7 | 28.0 | 46.1 | - |
| 46 | 7025-3876 | 2015 | 140.663 | -36.302 | 15.5 | 31.0 | 55.6 | - |
| 47 | 7025-3877 | 2015 | 140.663 | -36.302 | 15.4 | 31.0 | 49.2 | - |
| 48 | 7025-4030 | 2015 | 140.663 | -36.307 | 16.1 | 28.0 | 56.9 | - |
| 49 | 7025-4031 | 2015 | 140.663 | -36.291 | 15.4 | 28.0 | 61.1 | - |
| 50 | 7026-113 | 1998 | 140.796 | -35.817 | 68.8 | 100.2 | 3.6 | - |
| Ovens/ Goulburn-Broken | | | | | | | | |
| 51 | 51743 | 2009 | 146.992 | -36.726 | 1.36 | 8.0 | 92.81 | 1.27 |
| 52 | 51744 | 2009 | 146.988 | -36.732 | 2.5 | 9.0 | 99.9 | 3.62 |
| 53 | 51737 | 2009 | 146.983 | -36.725 | 5.25 | 39.0 | 88.6 | 1.21 |
| 54 | 51738 | 2009 | 146.982 | -36.727 | -0.07 | 60.5 | 73.9 | 0.84 |
| 55 | 51735 | 2009 | 146.982 | -36.728 | 5.69 | 36.0 | 99.0 | 1.39 |
| 56 | 51736 | 2009 | 146.982 | -36.728 | 4.99 | 23.0 | 105.5 | 1.81 |
| 57 | 109462 | 2009 | 146.976 | -36.728 | 3.6 | 48.0 | 94.1 | 1.42 |
| 58 | 88274 | 2009 | 146.924 | -36.703 | 1.4 | 44.0 | 77.0 | 0.07 |
| 59 | 48069 | 2009 | 146.864 | -36.643 | 2.03 | 6.5 | 76.1 | 1.70 |
| 60 | 48068 | 2009 | 146.862 | -36.644 | 3.04 | 10.0 | 106.6 | 2.34 |
| 61 | 48067 | 2009 | 146.860 | -36.644 | 2.73 | 12.0 | 104.2 | 2.69 |
| 62 | 48066 | 2009 | 146.859 | -36.645 | 3.96 | 12.0 | 100.8 | 2.29 |
| 63 | 83232 | 2009 | 146.719 | -36.566 | 3.23 | 9.0 | 101.8 | 1.82 |
| 64 | 83231 | 2009 | 146.717 | -36.568 | 3.7 | 11.0 | 96.5 | 2.13 |
| 65 | 83229 | 2009 | 146.716 | -36.569 | 3.08 | 11.0 | 100.4 | 2.25 |
| 66 | 83230 | 2009 | 146.716 | -36.569 | 3.3 | 11.0 | 99.8 | 2.62 |
| 67 | 50788 | 2009 | 146.330 | -36.298 | 14.75 | 66.0 | 30.3 | 0.16 |
| 68 | 50789 | 2009 | 146.325 | -36.303 | 14.25 | 24.0 | 88.8 | 0.04 |
| 69 | 11326 | 2009 | 146.309 | -36.206 | 12.83 | 23.7 | 93.9 | 0.30 |
| 70 | 302296 | 2009 | 146.356 | -36.151 | 11.99 | 73.8 | 75.3 | 0.02 |
| 71 | 11323 | 2009 | 146.356 | -36.151 | 11.65 | 17.4 | 91.2 | 0.94 |
| 72 | 11306 | 2009 | 146.251 | -36.191 | 3.89 | 15.8 | 103.3 | 0.26 |
| 73 | 11311 | 2009 | 146.192 | -36.092 | 3.01 | 16.2 | 97.2 | 0.60 |
| 74 | 11310 | 2009 | 146.189 | -36.092 | 9.45 | 13.9 | 95.9 | 0.49 |
| 75 | 117 | 1985-1994 | 145.663 | -36.540 | 4.1 | 50.0 | 49.4 | 0.43 |
| 76 | 119 | 1987-2004 | 145.680 | -36.540 | 7.9 | 53.0 | 75.5 | 0.79 |
| 77 | 120 | 1987-2004 | 145.676 | -36.523 | 11.4 | 76.0 | 41.6 | 1.45 |
| 78 | 121 | 1987-2004 | 145.630 | -36.477 | 4.0 | 76.0 | 5.2 | 0.47 |
| 79 | 124 | 1987-2004 | 145.666 | -36.485 | 27.2 | 81.5 | 65.6 | 0.40 |
| 80 | 125 | 1987-2004 | 145.680 | -36.487 | 41.3 | 78.0 | 17.7 | 0.63 |
| 81 | 130 | 1987-2004 | 145.636 | -36.498 | 25.7 | 94.5 | 74.5 | 0.74 |
| 82 | 132 | 1987-2004 | 145.630 | -36.520 | 2.3 | 76.0 | 43.2 | 0.95 |
| 83 | 133 | 1987-2004 | 145.612 | -36.539 | 12.5 | 76.0 | 41.0 | 0.75 |
| 84 | 143 | 1987-2004 | 145.651 | -36.466 | 3.6 | 61.0 | 28.0 | 0.61 |
| 85 | 8113 | 1980-2004 | 145.630 | -36.557 | 2.6 | 19.7 | 51.6 | 0.24 |
| 86 | 8121 | 1980-2004 | 145.594 | -36.489 | 3.2 | 16.6 | 97.9 | 2.44 |
| 87 | 8124 | 1980-2004 | 145.705 | -36.459 | 2.0 | 13.0 | 47.1 | 0.93 |
| 88 | 8127 | 1980-2004 | 145.711 | -36.447 | 2.8 | 19.7 | 54.1 | 0.48 |
| 89 | 8130 | 1980-2004 | 145.711 | -36.436 | 3.1 | 16.6 | 65.9 | 0.28 |
| 90 | 8142 | 1983-2004 | 145.649 | -36.489 | 13.0 | 19.8 | 85.9 | 1.55 |
| 91 | 8143 | 1983-2004 | 145.648 | -36.484 | 8.2 | 18.1 | 83.6 | 0.98 |
| 92 | 8145 | 1983-2004 | 145.634 | -36.485 | 3.2 | 20.3 | 86.3 | 0.62 |
| 93 | 8126* | 1980-2004 | 145.705 | -36.459 | 0.4 | 3.1 | 100.1 | 1.70 |
| 94 | 8131* | 1980-2004 | 145.712 | -36.436 | 3.3 | 4.9 | 94.7 | 1.01 |
| 95 | 8135* | 1983-2004 | 145.627 | -36.565 | 7.5 | 7.3 | 103.2 | 1.90 |
| 96 | 8144* | 1983-2004 | 145.648 | -36.484 | 8.2 | 11.0 | 92.4 | 0.52 |
| 97 | 153 | 1984-2004 | 145.933 | -36.674 | 2.1 | 100.0 | 77.5 | 0.67 |
| 98 | 155 | 1984-2004 | 145.937 | -36.675 | 4.2 | 30.0 | 91.3 | 3.34 |
| 99 | 8402 | 1982-2005 | 145.933 | -36.674 | 4.7 | 15.4 | 88.3 | 2.53 |
| 100 | 8403 | 1982-2005 | 145.933 | -36.676 | 2.9 | 19.4 | 84.3 | 1.56 |
| 101 | 8416 | 1982-2005 | 145.924 | -36.663 | 3.0 | 15.8 | 97.5 | 1.63 |
| 102 | 8420 | 1982-2005 | 145.932 | -36.681 | 2.3 | 18.0 | 99.2 | 0.80 |
| 103 | 8404* | 1982-2005 | 145.933 | -36.676 | 3.2 | 7.5 | 96.4 | 1.46 |
| 104 | 8412* | 1982-2005 | 145.931 | -36.662 | 1.5 | 5.1 | 105.1 | 1.80 |
| 105 | 8415* | 1982-2005 | 145.932 | -36.664 | 8.2 | 6.1 | 102.9 | 1.94 |
| 106 | 8421* | 1983-2005 | 145.932 | -36.681 | 1.5 | 5.3 | 97.9 | 1.89 |
| 107 | 11203* | 1989-1998 | 146.523 | -36.395 | 3.2 | 9.3 | 94.5 | 2.09 |
| 108 | 11205* | 1989-1998 | 146.525 | -36.398 | 2.2 | 2.9 | 90.3 | 0.81 |
| 109 | 11206 | 1989-1999 | 146.526 | -36.400 | 2.4 | 9.5 | 94.5 | 1.69 |
| 110 | 11207 | 1989-2000 | 146.526 | -36.403 | 8.5 | 17.7 | 93.4 | 1.02 |
| 111 | 11451 | 1999-2000 | 146.526 | -36.378 | 2.3 | 11.0 | 61.5 | 0.14 |
| 112 | 11452 | 1999-2000 | 146.526 | -36.378 | 0.3 | 12.9 | 92.5 | 3.31 |

Table S3: Calculated MRTs using Eqs. 2-4. MRTs calculated from 14C are typically rounded to the nearest 5 to 100 years (e.g., Fontes and Garnier, 1979; Plummer and Sprinkle, 2001; Carmi et al., 2009). Here the MRTs are rounded to the nearest 10 years. Well ID numbers from original publications. Note, DTW and 14Cgw values are rounded in Table S3 relative to values used to calculate MRTs.

| Sample ID | Well ID | Depth to Water (mbg) | 14Cgw (pmC) | Uncorrected MRT (y) | DTW-corrected MRT, lower (y) (Eq, 4) | DTW-corrected, MRT, best (y) (Eq, 2) | DTW-corrected MRT, upper (y) (Eq, 3) |
| --- | --- | --- | --- | --- | --- | --- | --- |
| Limestone Coast | | | | | | | |
| 0 | 6923-3682 | 1.6 | 54.4 | 5030 | 3230 | 5180 | 7200 |
| 1 | 7021-1043 | 0.5 | 66.1 | 3420 | 1770 | 3730 | 5740 |
| 2 | 7022-128 | 27.8 | 62.4 | 3900 | 500 | 500 | 2460 |
| 3 | 7022-139 | 26.4 | 48.8 | 5940 | 610 | 2620 | 4690 |
| 4 | 7022-837 | 5.4 | 27.0 | 10820 | 8480 | 10450 | 12470 |
| 5 | 7022-1042 | 2.0 | 78.2 | 2030 | 500 | 2130 | 4140 |
| 6 | 7022-1094 | 7.2 | 77.1 | 2150 | 500 | 1520 | 3540 |
| 7 | 7022-1863 | 12.2 | 62.5 | 3890 | 570 | 2550 | 4590 |
| 8 | 7022-8517 | 6.1 | 14.1 | 16200 | 13750 | 15720 | 17740 |
| 9 | 7022-8518 | 5.3 | 19.3 | 13600 | 11260 | 13230 | 15250 |
| 10 | 7022-8519 | 6.0 | 59.2 | 4330 | 1900 | 3870 | 5890 |
| 11 | 7022-8520 | 6.0 | 83.0 | 1540 | 500 | 1070 | 3100 |
| 12 | 7022-8522 | 8.5 | 48.8 | 5930 | 3140 | 5110 | 7140 |
| 13 | 7022-8523 | 10.1 | 56.8 | 4680 | 1660 | 3630 | 5660 |
| 14 | 7022-8524 | 10.0 | 64.7 | 3600 | 600 | 2580 | 4610 |
| 15 | 7022-8525 | 8.0 | 72.8 | 2620 | 500 | 1880 | 3910 |
| 16 | 7022-10572 | 27.5 | 13.4 | 16650 | 11160 | 13180 | 15250 |
| 17 | 7022-10573 | 18.5 | 69.6 | 2990 | 500 | 780 | 2830 |
| 18 | 7022-10574 | 10.3 | 77.3 | 2130 | 500 | 1070 | 3100 |
| 19 | 7022-10687 | 26.9 | 6.7 | 22310 | 16900 | 18920 | 20990 |
| 20 | 7022-10688 | 25.8 | 5.2 | 24430 | 19170 | 21180 | 23250 |
| 21 | 7022-10776 | 5.6 | 84.7 | 1370 | 500 | 960 | 2980 |
| 22 | 7022-10778 | 25.7 | 57.2 | 4620 | 500 | 1390 | 3460 |
| 23 | 7022-10781 | 22.7 | 44.5 | 6690 | 1880 | 3890 | 5950 |
| 24 | 7023-5280 | 6.5 | 9.7 | 19250 | 16750 | 18720 | 20740 |
| 25 | 7023-7133 | 7.2 | 64.5 | 3620 | 1020 | 2990 | 5010 |
| 26 | 7023-7134 | 17.5 | 68.5 | 3130 | 500 | 1060 | 3110 |
| 27 | 7023-7135 | 6.6 | 44.3 | 6730 | 4200 | 6170 | 8200 |
| 28 | 7024-2960 | 10.6 | 63.6 | 3740 | 650 | 2630 | 4660 |
| 29 | 7024-5457 | 5.3 | 82.9 | 1550 | 500 | 1180 | 3200 |
| 30 | 7024-5458 | 5.8 | 71.0 | 2830 | 500 | 2390 | 4420 |
| 31 | 7024-5459 | 12.4 | 36.5 | 8330 | 4990 | 6970 | 9010 |
| 32 | 7024-5460 | 15.3 | 11.8 | 17670 | 13910 | 15900 | 17950 |
| 33 | 7024-5462 | 22.5 | 54.1 | 5080 | 500 | 2300 | 4360 |
| 34 | 7024-5463 | 14.7 | 5.2 | 24440 | 20770 | 22760 | 24800 |
| 35 | 7024-5464 | 15.6 | 70.1 | 2940 | 500 | 1130 | 3170 |
| 36 | 7024-5465 | 15.6 | 61.4 | 4030 | 500 | 2220 | 4260 |
| 37 | 7024-5466 | 16.2 | 43.3 | 6920 | 3030 | 5020 | 7070 |
| 38 | 7024-5468 | 11.4 | 55.5 | 4870 | 1670 | 3650 | 5680 |
| 39 | 7024-5470 | 7.5 | 73.8 | 2510 | 500 | 1840 | 3860 |
| 40 | 7024-5471 | 7.5 | 73.5 | 2550 | 500 | 1870 | 3900 |
| 41 | 7025-865 | 16.5 | 67.6 | 3240 | 500 | 1310 | 3360 |
| 42 | 7025-868 | 10.7 | 60.8 | 4120 | 1020 | 2990 | 5030 |
| 43 | 7025-2615 | 9.4 | 62.0 | 3950 | 1040 | 3020 | 5050 |
| 44 | 7025-3222 | 11.5 | 61.0 | 4090 | 880 | 2860 | 4890 |
| 45 | 7025-3875 | 16.7 | 46.1 | 6400 | 2440 | 4440 | 6480 |
| 46 | 7025-3876 | 15.5 | 55.6 | 4850 | 1070 | 3050 | 5100 |
| 47 | 7025-3877 | 15.4 | 49.2 | 5860 | 2090 | 4080 | 6130 |
| 48 | 7025-4030 | 16.1 | 56.9 | 4660 | 790 | 2780 | 4830 |
| 49 | 7025-4031 | 15.4 | 61.1 | 4080 | 500 | 2290 | 4330 |
| 50 | 7026-113 | 68.8 | 3.6 | 27480 | 16130 | 18230 | 20400 |
| Ovens/ Goulburn-Broken | | | | | | | |
| 51 | 51743 | 1.4 | 92.8 | 620 | 500 | 800 | 2810 |
| 52 | 51744 | 2.5 | 99.9 | 500 | 500 | 500 | 2050 |
| 53 | 51737 | 5.3 | 88.6 | 1000 | 500 | 640 | 2660 |
| 54 | 51738 | -0.1 | 73.9 | 2500 | 930 | 2890 | 4900 |
| 55 | 51735 | 5.7 | 99.0 | 500 | 500 | 500 | 1680 |
| 56 | 51736 | 5.0 | 105.5 | 500 | 500 | 500 | 1260 |
| 57 | 109462 | 3.6 | 94.1 | 500 | 500 | 500 | 2390 |
| 58 | 88274 | 1.4 | 77.0 | 2160 | 500 | 2340 | 4350 |
| 59 | 48069 | 2.0 | 76.1 | 2260 | 500 | 2350 | 4370 |
| 60 | 48068 | 3.0 | 106.6 | 500 | 500 | 500 | 1430 |
| 61 | 48067 | 2.7 | 104.2 | 500 | 500 | 500 | 1670 |
| 62 | 48066 | 4.0 | 100.8 | 500 | 500 | 500 | 1770 |
| 63 | 83232 | 3.2 | 101.8 | 500 | 500 | 500 | 1790 |
| 64 | 83231 | 3.7 | 96.5 | 500 | 500 | 500 | 2170 |
| 65 | 83229 | 3.1 | 100.4 | 500 | 500 | 500 | 1920 |
| 66 | 83230 | 3.3 | 99.8 | 500 | 500 | 500 | 1950 |
| 67 | 50788 | 14.8 | 30.3 | 9880 | 6200 | 8190 | 10230 |
| 68 | 50789 | 14.3 | 88.8 | 980 | 500 | 500 | 1400 |
| 69 | 11326 | 12.8 | 93.9 | 520 | 500 | 500 | 1140 |
| 70 | 302296 | 12.0 | 75.3 | 2340 | 500 | 1040 | 3080 |
| 71 | 11323 | 11.7 | 91.2 | 760 | 500 | 500 | 1540 |
| 72 | 11306 | 3.9 | 103.3 | 500 | 500 | 500 | 1580 |
| 73 | 11311 | 3.0 | 97.2 | 500 | 500 | 500 | 2210 |
| 74 | 11310 | 9.5 | 95.9 | 500 | 500 | 500 | 1430 |
| 75 | 117 | 4.1 | 49.4 | 5830 | 3670 | 5630 | 7650 |
| 76 | 119 | 7.9 | 75.5 | 2320 | 500 | 1600 | 3620 |
| 77 | 120 | 11.4 | 41.6 | 7250 | 4060 | 6040 | 8070 |
| 78 | 121 | 4.0 | 5.2 | 24440 | 22300 | 24260 | 26280 |
| 79 | 124 | 27.2 | 65.6 | 3490 | 500 | 500 | 2120 |
| 80 | 125 | 41.3 | 17.7 | 14320 | 6860 | 8910 | 11010 |
| 81 | 130 | 25.7 | 74.5 | 2430 | 500 | 500 | 1280 |
| 82 | 132 | 2.3 | 43.2 | 6940 | 5030 | 6990 | 9000 |
| 83 | 133 | 12.5 | 41.0 | 7370 | 4010 | 6000 | 8030 |
| 84 | 143 | 3.6 | 28.0 | 10520 | 8430 | 10390 | 12410 |
| 85 | 8113 | 2.6 | 51.6 | 5470 | 3520 | 5480 | 7490 |
| 86 | 8121 | 3.2 | 97.9 | 500 | 500 | 500 | 2120 |
| 87 | 8124 | 2.0 | 47.1 | 6220 | 4360 | 6320 | 8340 |
| 88 | 8127 | 2.8 | 54.1 | 5080 | 3100 | 5060 | 7080 |
| 89 | 8130 | 3.1 | 65.9 | 3450 | 1430 | 3390 | 5400 |
| 90 | 8142 | 13.0 | 85.9 | 1260 | 500 | 500 | 1850 |
| 91 | 8143 | 8.2 | 83.6 | 1480 | 500 | 700 | 2730 |
| 92 | 8145 | 3.2 | 86.3 | 1220 | 500 | 1150 | 3160 |
| 93 | 8126* | 0.4 | 100.1 | 500 | 500 | 500 | 2320 |
| 94 | 8131* | 3.3 | 94.7 | 500 | 500 | 500 | 2380 |
| 95 | 8135* | 7.5 | 103.2 | 500 | 500 | 500 | 1100 |
| 96 | 8144* | 8.2 | 92.4 | 650 | 500 | 500 | 1910 |
| 97 | 153 | 2.1 | 77.5 | 2110 | 500 | 2190 | 4200 |
| 98 | 155 | 4.2 | 91.3 | 750 | 500 | 540 | 2560 |
| 99 | 8402 | 4.7 | 88.3 | 1030 | 500 | 740 | 2760 |
| 100 | 8403 | 2.9 | 84.3 | 1410 | 500 | 1380 | 3390 |
| 101 | 8416 | 3.0 | 97.5 | 500 | 500 | 500 | 2180 |
| 102 | 8420 | 2.3 | 99.2 | 500 | 500 | 500 | 2130 |
| 103 | 8404* | 3.2 | 96.4 | 500 | 500 | 500 | 2250 |
| 104 | 8412* | 1.5 | 105.1 | 500 | 500 | 500 | 1770 |
| 105 | 8415* | 8.2 | 102.9 | 500 | 500 | 500 | 1020 |
| 106 | 8421* | 1.5 | 97.9 | 500 | 500 | 500 | 2350 |
| 107 | 11203* | 3.2 | 94.5 | 500 | 500 | 500 | 2410 |
| 108 | 11205* | 2.2 | 90.3 | 840 | 500 | 920 | 2930 |
| 109 | 11206 | 2.4 | 94.5 | 500 | 500 | 510 | 2530 |
| 110 | 11207 | 8.5 | 93.4 | 560 | 500 | 500 | 1770 |
| 111 | 11451 | 2.3 | 61.5 | 4020 | 2110 | 4070 | 6080 |
| 112 | 11452 | 0.3 | 92.5 | 640 | 500 | 970 | 2980 |


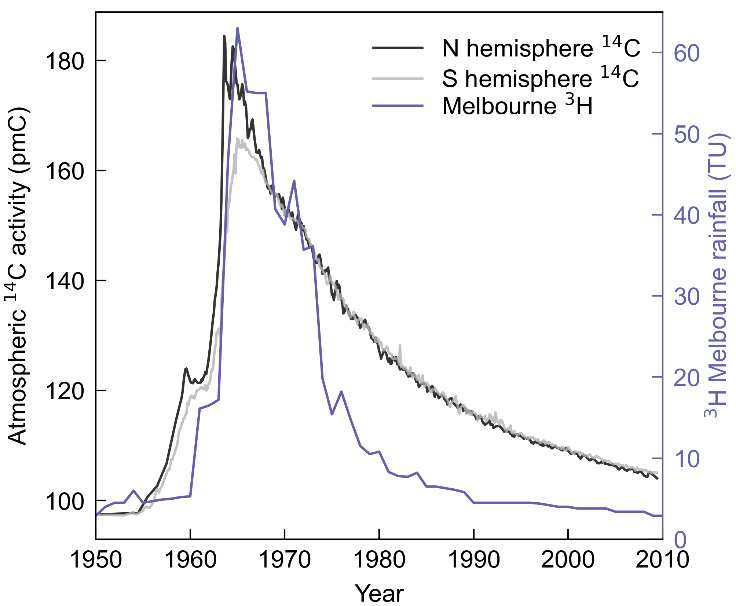


# Figure S1: Atmospheric 14C activities (pmC) for the northern (black) and southern (grey) hemispheres and 3H activities (TU) for Melbourne in Australia (purple). 14C data from Hua et al. (2013). 3H data from Cartwright et al. (2018).

# References

Bacon, D.H., Keller, C.K.: Carbon dioxide respiration in the deep vadose zone: implications for groundwater age dating. Water Resour. Res. 34 (11), 3069–3077, doi:10.1029/98WR02045, 1998.

Carmi, I., Kronfeld, J., Yechieli, Y., Yakir, D., Boaretto, E., Stiller, M.: Carbon isotopes in pore water of the unsaturated zone and their relevance for initial 14C activity in groundwater in the coastal aquifer of Israel. Chem. Geol. 268, 189-196, doi:10.1016/j.chemgeo.2009.08.010, 2009.

Cartwright, I., Irvine, D.J., Burton, C., Morgenstern, U.: Assessing the controls and uncertainties on mean transit times in contrasting headwater catchments. J. Hydrol. 557, 16-29, doi: 10.1016/j.jhydrol.2017.12.007, 2018.

Fritz, P., Reardon, E.J., Barker, J., Brown, R.M., Cherry, J.A., Killey, R.W.D., McNaughton, D.: The Carbon Isotope Geochemistry of a Small Groundwater System in Northeastern Ontario. Wat. Resour. Res. 14 (6), 1059–1067, doi: 10.1029/WR014i006p01059, 1978.

Fontes, J.-C., Garnier, J.-M.: Correction des activités apparentes en 14C du carbone dessous: Estimation de la Vitesse des eaux en nappes captives (abstract), C.R. Reunion Anni. Sci. Terre., 170, 1976.

Gillon, M., Barbecot, F., Gibert, E., Corcho Alvarado, J.A., Martin, C., Massault, M.: Open to closed system transition traced through the TDIC isotopic signature at the aquifer recharge stage, implications for groundwater 14C dating. Geochim. Cosmochim. Acta. 73, 6488–6501, doi: 10.1016/j.gca.2009.07.032, 2009.

Haas, H., Fisher, D.W., Thorstenson, D.C., Weeks, E.P.: 13CO2 and 14CO2 measurements on soil atmosphere sampled in the sub-surface unsaturated zone in the Western Great Plains of the US. Radiocarbon 25 (2), 301–314, doi: 10.1017/S0033822200005610, 1983.

Hua, Q., Barbetti, M., and Rakowski, A. Z.: Atmospheric radiocarbon for the period 1950-2010, Radiocarbon, 55, 2059-2072, 10.2458/azu_js_rc.v55i2.16177, 2013.

Kunkler, J.L.: The sources of carbon dioxide in the zone of aeration of the Bandelier Tuff, near Los Alamos, New Mexico: US Geol. Survey Prof Paper 650-13, B185-B188, 1969.

Leaney, F.W., Allison, G.B.: Carbon-14 and stable isotope data for an area in the Murray Basin: its use in estimating recharge. J. Hydrol. 88, 129–145, doi:10.1016/0022-1694(86)90201-5, 1986.

Plummer, L. N., and Sprinkle, C. L.: Radiocarbon dating of dissolved inorganic carbon in groundwater from confined parts of the Upper Floridan aquifer, Florida, USA, Hydrogeol. J., 9, 127-150, 2001.

Reardon, E.J., Allison, G.B., Fritz, P.: Seasonal chemical and isotopic variations of soil CO2 at Trout Creek, Ontario. J. Hydrol. 43, 355–371, doi:10.1016/0022-1694(79)90181-1, 1979.

Thorstenson, D.C., Weeks, E.P., Haas, H., Fisher, D.W.: Distribution of gaseous 12CO2, 13CO2, and 14CO2 in the sub-soil unsaturated zone of the Western US Great Plains. Radiocarbon 25 (2), 315–346, doi:10.1017/S0033822200005622, 1983.

Thorstenson, D.C., Weeks, E.P., Haas, H., Busenberg, E., Plummer, L.N., Peters, C.A.: Chemistry of unsaturated zone gases sampled in open boreholes at the crest of Yucca mountain, Nevada: Data and basic concepts of chemical and physical processes in the mountain. Wat. Resour. Res. 34 (6), 1507–1529, doi:10.1029/98WR00267, 1998.

Walvoord, M.A., Striegl, R.G., Prudic, D.E., Stonestrom, D.A.: CO2 dynamics in the Armagosa Desert: fluxes and isotopic speciation in a deep unsaturated zone. Water Resour. Res. 41, doi:10.1029/2004WR003599, 2005.

Wood, C., Cook, P.G., Harrington, G.A., Meredith, K., Kipfer, R.: Factors affecting carbon-14 activity of unsaturated zone CO2 and implications for groundwater dating. J. Hydrol. 519, 465–475, doi: 10.1016/j.jhydrol.2014.07.034, 2014.

Yang, C., Haas, H.H., Weeks, E.P., Thorstenson, D.C.: Analysis of gaseous-phase stable and radioactive isotopes in the unsaturated zone, Yucca Mountain, Nevada. Conference on characterization and monitoring of the vadose zone; Denver, CO (USA); 19-21, 1985.
